# Supplementary material for: Microcarrier-Based Culture of Human Pluripotent Stem-Cell-Derived Retinal Pigmented Epithelium
Source: MDPI journal article supplement (doi:10.3390/bioengineering9070297), 2022-07-04
Supplement: s1 [file s1]

# Microcarrier-Based Culture of Human Pluripotent Stem-Cell-Derived Retinal Pigmented Epithelium

Mohamed A. Faynus <sup>1,2,\*</sup>, Jeffrey K. Bailey <sup>2</sup>, Britney O. Pennington <sup>2</sup>, Mika Katsura <sup>2</sup>, Duncan A. Proctor <sup>2,3</sup>  
Ashley K. Yeh <sup>2,3</sup>, Sneha Menon <sup>2,3</sup>, Dylan G. Choi <sup>2,4</sup>, Jane S. Lebkowski <sup>6</sup>, Lincoln V. Johnson <sup>6</sup>  
and Dennis O. Clegg <sup>2,3,5,6</sup>

<sup>1</sup> Program for Biomolecular Science and Engineering, University of California, Santa Barbara, CA 93106, USA

<sup>2</sup> Center for Stem Cell Biology and Engineering, Neuroscience Research Institute, University of California, Santa Barbara, CA 93106, USA; jkbailey@ucsb.edu (J.K.B.); bop@ucsb.edu (B.O.P.); mikakatsura@ucsb.edu (M.K.); duncan@ucsb.edu (D.A.P.); ashleyyeh@umail.ucsb.edu (A.K.Y.); snehamenon@ucsb.edu (S.M.); dylanchoi@ucsb.edu (D.G.C.); clegg@ucsb.edu (D.O.C.)

<sup>3</sup> Department of Molecular, Cellular and Developmental Biology, University of California, Santa Barbara, CA 93106, USA

<sup>4</sup> College of Creative Studies, Chemistry and Biochemistry, University of California, Santa Barbara, CA 93106, USA

<sup>5</sup> Program in Biological Engineering, University of California, Santa Barbara, CA 93106, USA

<sup>6</sup> Regenerative Patch Technologies LLC, Portola Valley, CA 94028, USA; jane@regenerativepatch.com (J.S.L.); linc@regenerativepatch.com (L.V.J.)

\* Correspondence: faynus@ucsb.edu

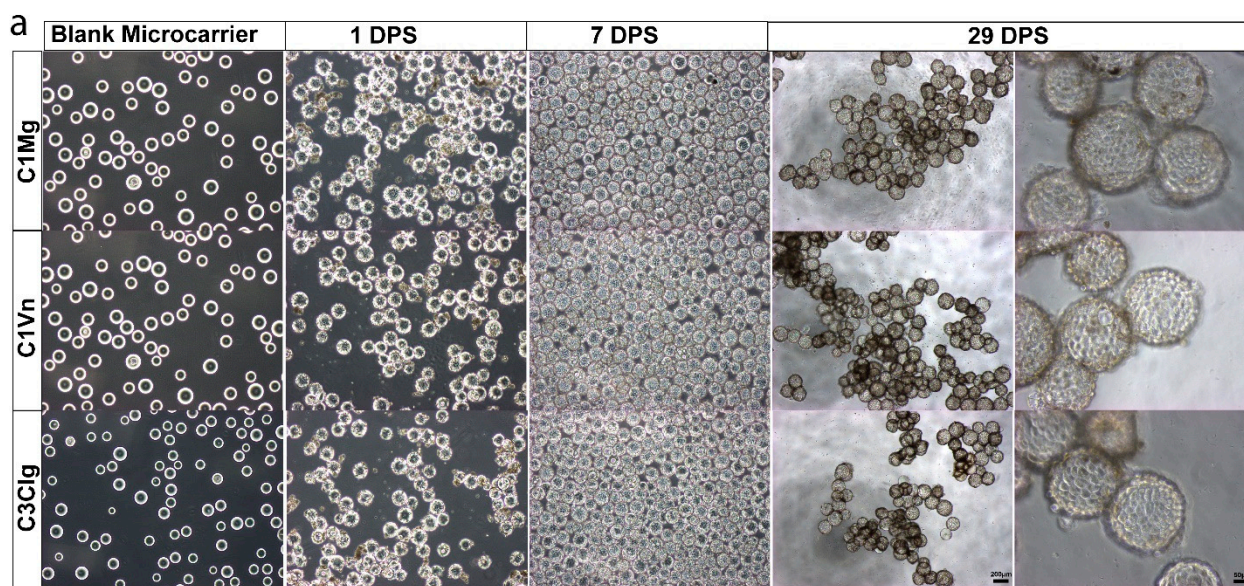

**Figure S1.** mcRPE mature and pigment over 30-day culture period. Phase contrast images demonstrate attachment of hESC-RPE cells to Matrigel and recombinant human vitronectin coated Cytodex 1 as well as pre-coated collagen Cytodex 3 microcarriers. mcRPE display cobblestone morphology, phase bright borders and pigmentation 29DPS.

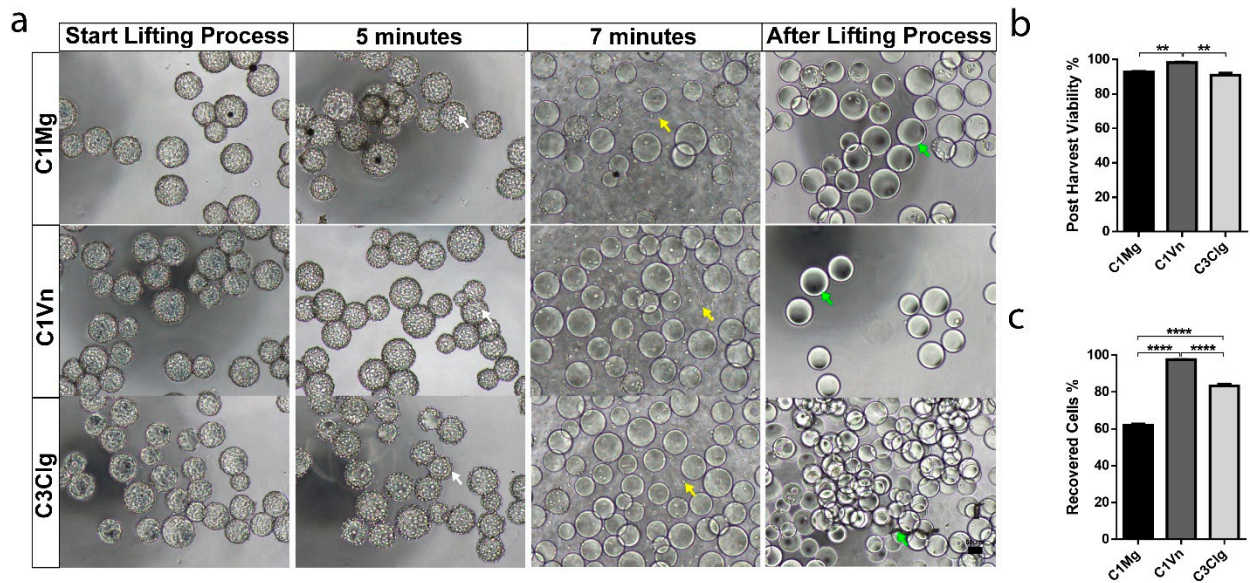

**Figure S2.** Harvesting hESC-RPE cells from microcarriers using a xeno-free enzymatic disassociation reagent. **a)** mcRPE were collected at a density of  $2 \times 10^5$  cells per well and exposed to TrypLE enzyme for a period of 7 min. Cells were still attached at 5 min (white arrows) and were completely dissociated after mechanical perturbation at 7 minutes. Dissociated cells were clearly visualized post perturbation (yellow arrow) and harvested by filtration to separate microcarriers from cells. Empty microcarriers (green arrow) after filtration process demonstrates appropriate harvesting of hESC-RPE cells. **b)** Viability of harvested hESC-RPE cells were assessed using Acridine Orange/DAPI exclusion on an NC200. All three conditions demonstrate high viability with C1Vn exhibiting significantly greater viability than C1Mg and C3Clg (\*\* $p < 0.05$ ). **c)** Cell recovery was quantified using Acridine Orange/DAPI and compared to initial starting density equating to an approximate  $2 \times 10^5$  cells. All three conditions were amenable to cell recovery but C1Vn exhibited a significantly greater percentage of recovered cells compared to C1Mg and C3Clg. C1Mg was the least favorable coating for cell recovery (\*\*\*\* $p < 0.001$ ). Statistical analysis, one way ANOVA, Tukey's correction.

**Table S1.** Calculations to determine the required surface area to meet the estimated patient demand and approaches to achieve.

| Surface Area Required to Supply $8 \times 10^9$ RPE Cells*                                                                                                                                                   |                                                                                                                                                                                                          |
|--------------------------------------------------------------------------------------------------------------------------------------------------------------------------------------------------------------|----------------------------------------------------------------------------------------------------------------------------------------------------------------------------------------------------------|
| $\frac{8 \times 10^9 \text{ RPE cells}}{\text{year}} \times \frac{\text{cm}^2}{2.1 \times 10^5 \text{ RPE cells}} \times \frac{1 \text{ year}}{12 \text{ months}} = \frac{3,174 \text{ cm}^2}{\text{month}}$ |                                                                                                                                                                                                          |
| Approaches to Achieve $\frac{3,174 \text{ cm}^2}{\text{month}}$                                                                                                                                              |                                                                                                                                                                                                          |
| T-75 Flasks                                                                                                                                                                                                  | $\frac{3,174 \text{ cm}^2}{\text{month}} \times \frac{1 \text{ flask}}{75 \text{ cm}^2} \cong \frac{42 \text{ flasks}}{\text{month}}$                                                                    |
| T-225 Flasks                                                                                                                                                                                                 | $\frac{3,174 \text{ cm}^2}{\text{month}} \times \frac{1 \text{ flask}}{225 \text{ cm}^2} \cong \frac{14 \text{ flasks}}{\text{month}}$                                                                   |
| Cytodex 1                                                                                                                                                                                                    | $\frac{3,174 \text{ cm}^2}{\text{month}} \times \frac{\text{g of Cytodex1}}{4400 \text{ cm}^2} \times \frac{\text{L}}{5 \text{ g of Cytodex**}} = \frac{144 \text{ mL Bioreactor Volume}}{\text{month}}$ |
| Cytodex 3                                                                                                                                                                                                    | $\frac{3,174 \text{ cm}^2}{\text{month}} \times \frac{\text{g of Cytodex3}}{2700 \text{ cm}^2} \times \frac{\text{L}}{5 \text{ g of Cytodex**}} = \frac{235 \text{ mL Bioreactor Volume}}{\text{month}}$ |

\* Estimate of the required cells assumes that only half of the projected number of AMD patients in the United States receives an RPE cell-based therapy [36].

\*\* Microcarrier cultures may contain 1-5g of Cytodex/L [21].
